# Supplementary material for: Lemon Oils Attenuate the Pathogenicity of Pseudomonas aeruginosa by Quorum Sensing Inhibition
Source: MDPI journal article supplement (doi:10.3390/molecules26102863), 2021-05-12
Supplement: s1 [file s1]

## Supplementary Material

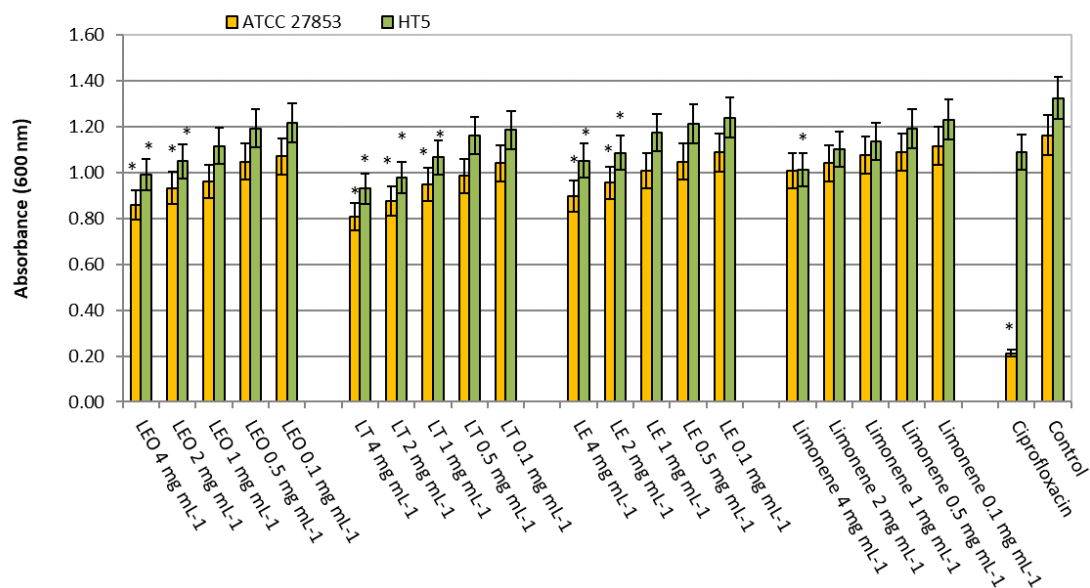

**Figure S1.** *Pseudomonas aeruginosa* growth without (control) and in the presence of ciprofloxacin (5  $\mu$ g mL<sup>-1</sup>) or different lemon oils concentrations (0.1-4 mg mL<sup>-1</sup>). LEO: Lemon Essential Oil, LT: Lemon Terpenes, LE: Lemon Essence. Asterisk indicates significant differences compared to the respective control (Tukey's multiple range test, P < 0.05).
